# Supplementary material for: Epithelial inactivation of Yy1 abrogates lung branching morphogenesis
Source: Oxford University Press journal article supplement (doi:10.1242/dev.120469), 2015-09-01
Supplement: dev120469supp.pdf [file dev120469supp.pdf]

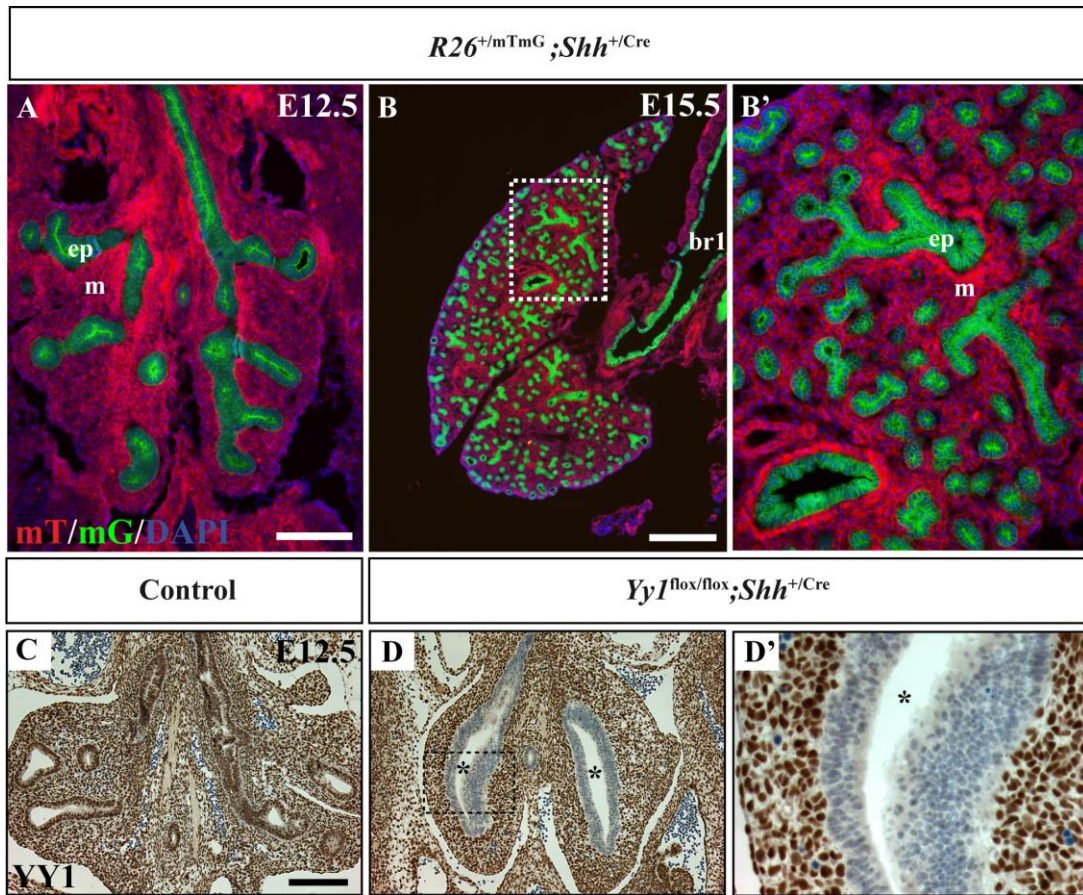

**Figure S1. Cre recombinase specificity and efficiency of the *Yy1* deletion by the *Shh*<sup>Cre</sup> allele in the developing lung.** (A,B) Validation of Cre efficiency was assessed by breeding *Shh*<sup>+/Cre</sup> mice with *R26*<sup>mTmG/mTmG</sup> reporter mice expressing the membrane-targeted tandem dimer Tomato (mT) prior Cre-mediated excision and membrane-targeted green fluorescent protein (mG) after excision. At E12.5 (A) and E15.5 (B), GFP expression was detected in the respiratory epithelium. No Cre activity was detected in lung mesenchyme. (C,D) YY1 IHC experiments demonstrated the loss of YY1 expression in the respiratory epithelium of E12.5 *Yy1*<sup>flox/flox</sup>;*Shh*<sup>+/Cre</sup> embryos. Boxed areas in B and D are magnified in B' and D', respectively. Br1, primary bronchi; ep, epithelium; m, mesenchyme. Asterisks indicate cysts. Scale bars: 200  $\mu$ m (A,C,D), 300  $\mu$ m (B).

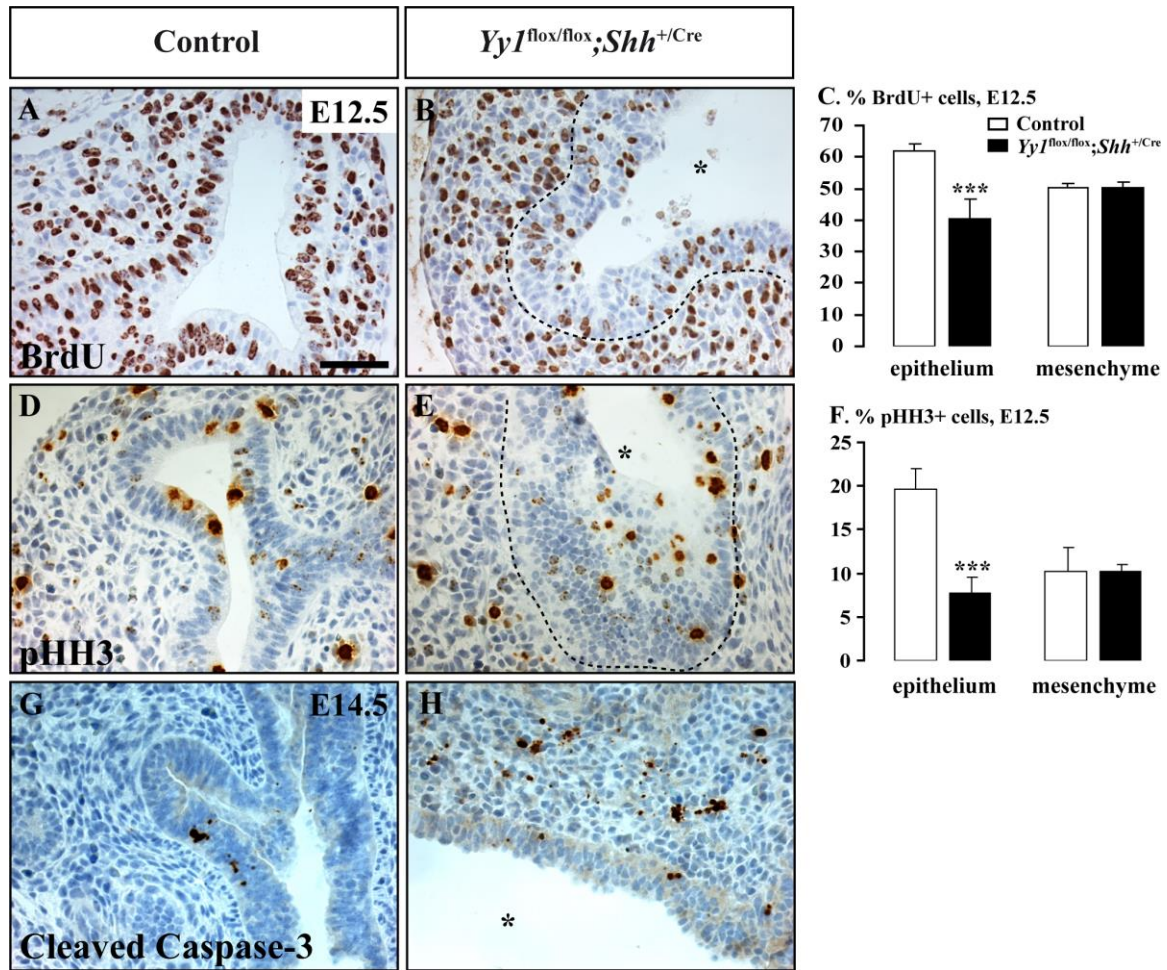

**Figure S2. Reduced epithelial proliferation and increased apoptosis in lungs from *Yy1*<sup>flox/flox</sup>;*Shh*<sup>+Cre</sup> mutants.** (A-C) The number of cells in S-phase, as determined by BrdU pulse-labeling assay, was significantly decreased in lung epithelium from *Yy1*<sup>flox/flox</sup>;*Shh*<sup>+Cre</sup> mutants while no change was seen in the mesenchyme. (D-F) Reduced proliferation of lung epithelial cells was also demonstrated by pHH3 immunostaining, a marker for cells in late G2 and mitosis. Thus, *Yy1* is essential for the control of lung epithelial cell proliferation throughout the cell cycle. (G,H) Cleaved caspase-3 immunostaining revealed increased apoptosis in lung mesenchyme of E14.5 *Yy1*<sup>flox/flox</sup>;*Shh*<sup>+Cre</sup> specimens. Asterisks indicate cysts. \*\*P<0.01. Scale bar: 50  $\mu$ m.

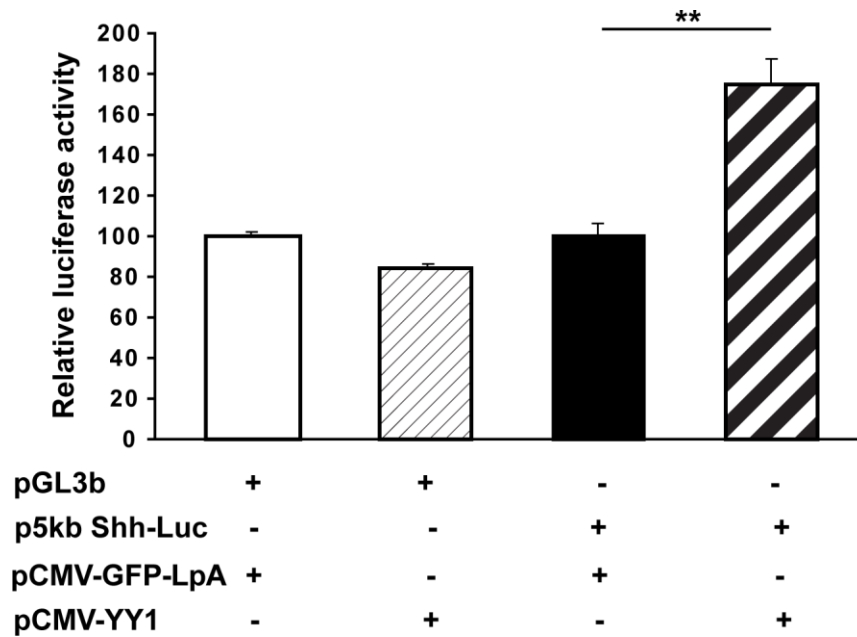

**Figure S3. YY1 can activate *Shh* expression in transactivation assays.** In a transient transfection assay in HEK293 cells, human YY1 protein upregulated transcription of a luciferase reporter construct containing a 5-kb genomic fragment encompassing *Shh* promoter and upstream sequences. Data from a representative experiment are presented as the fold induction $\pm$ s.d. of normalized relative luciferase activity. \*\* $P < 0.01$

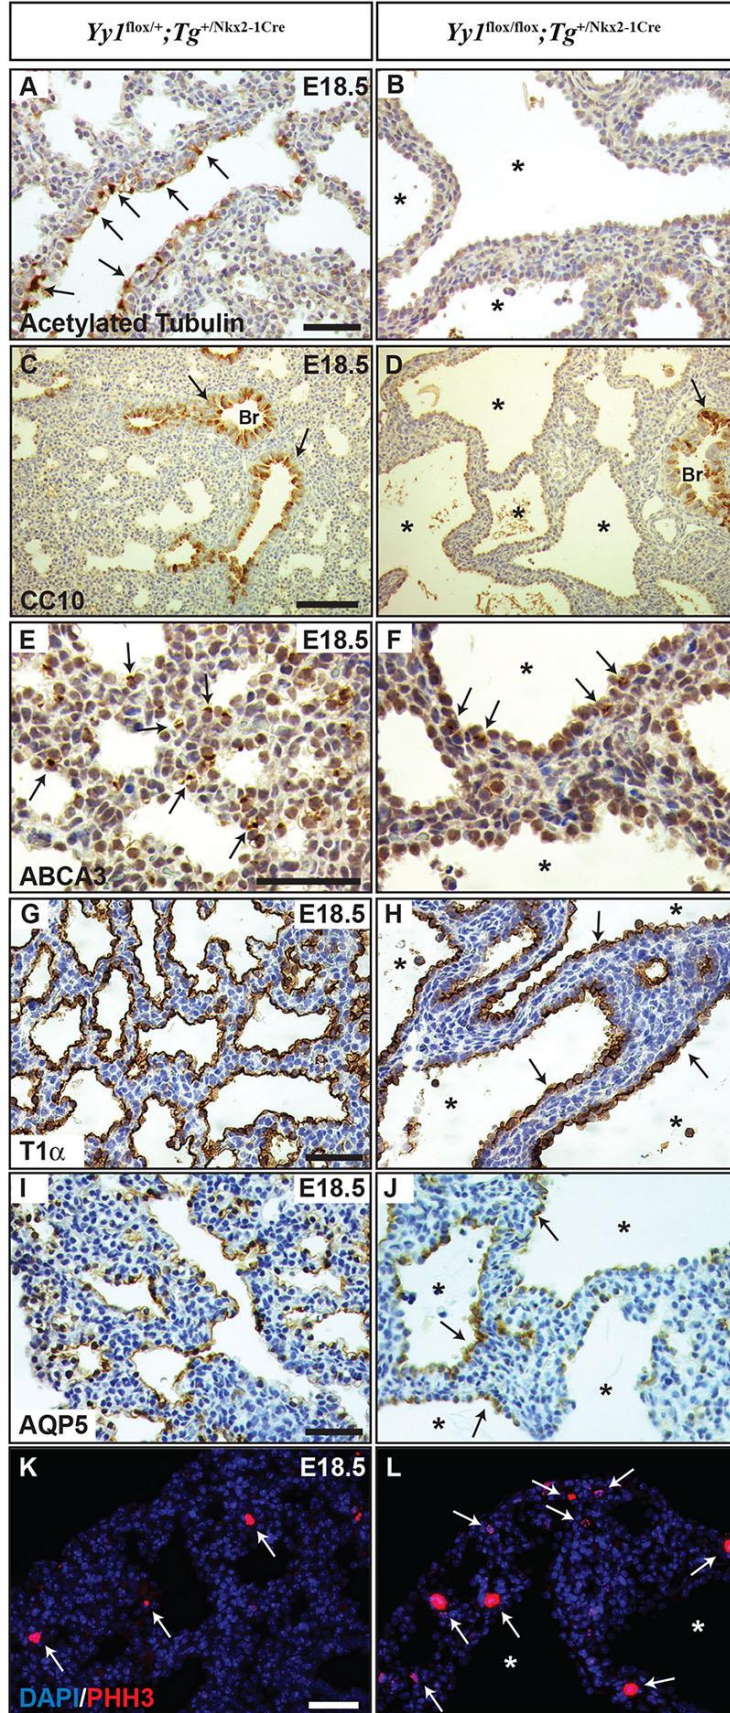

**Figure S4. Abnormal epithelial differentiation and increased cell proliferation in lungs from E18.5  $YyI^{flox/flox};Tg^{+/Nkx2-1Cre}$  embryos.** (A-D) Neither ciliated nor club cells, as detected by IHC with acetylated tubulin and CC10 specific markers, respectively, were observed in cyst epithelium of E18.5  $YyI^{flox/flox};Tg^{+/Nkx2-1Cre}$  mutants. (E-J) Cysts were lined by Type II and Type I pneumocytes as revealed by ABCA3 and T1 $\alpha$ /AQP5 specific markers, respectively (arrows). (K,L) pHH3-positive cells (arrows) revealed increased proliferation in lungs from E18.5  $YyI^{flox/flox}; Tg^{+/Nkx2-1Cre}$ . Br, bronchi. Asterisks indicate cysts. Scale bars: 50  $\mu$ m (A,B,E-L), 100  $\mu$ m (C,D).

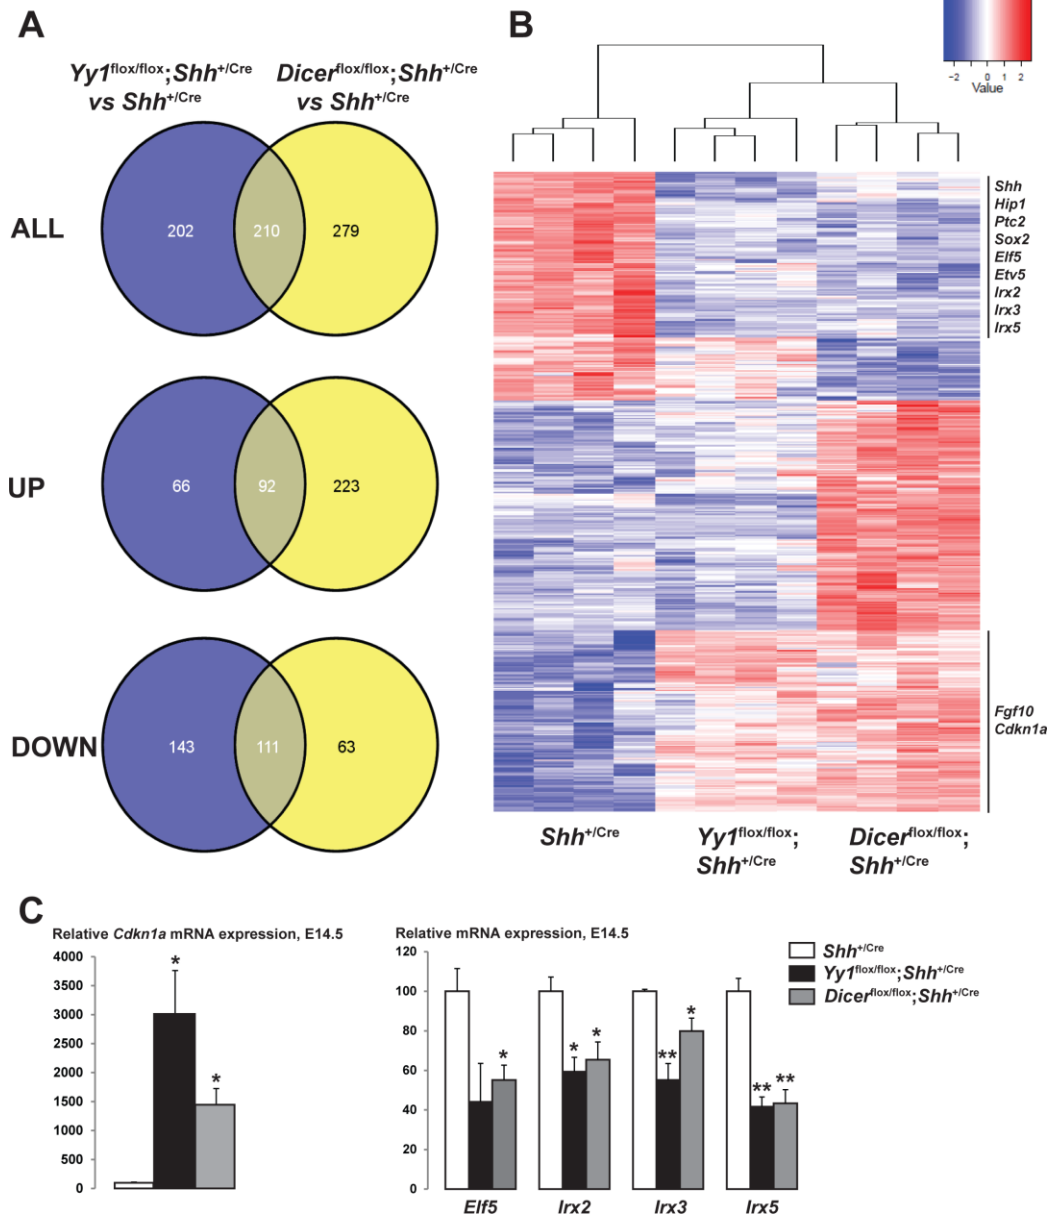

**Figure S5. Differential gene expression in lungs from E14.5 *Yy1*<sup>flox/flox</sup>;*Shh*<sup>+Cre</sup> and *Dicer*<sup>flox/flox</sup>;*Shh*<sup>+Cre</sup> embryos.** (A) Venn diagrams representing the overlap of genes differentially expressed ( $\geq 1.5$ -fold change; Benjamini-Hochberg-adjusted  $P < 0.05$ ) between genotypes. (B) Heat map analysis displaying deregulated genes ( $\geq 1.5$ -fold;  $P < 0.05$ ). The length of the arms of the dendrogram reflects the degree of correlation

between the samples. Genes mentioned in the text are indicated on the right. (C) qRT-PCR analyses for *Cdkn1a*, *Elf5*, *Irx2*, *Irx3*, and *Irx5* were performed on biological replicates and confirmed the microarray data. Values are expressed as mean±s.e.m. \*P<0.05, \*\*P<0.01.

**Table S1. General characteristics of cases**

| <b>N° Patient</b> | <b>Final Diagnosis</b>                     | <b>Age at tissue collection (months)</b> | <b>Localization</b> |
|-------------------|--------------------------------------------|------------------------------------------|---------------------|
| 1                 | sudden infant death                        | 4                                        | n.a.                |
| 2                 | sudden infant death                        | 7                                        | n.a.                |
| 3                 | sudden infant death                        | 12                                       | n.a.                |
| 4                 | sudden infant death                        | 10                                       | n.a.                |
| 5                 | sudden infant death                        | 7                                        | n.a.                |
| 6                 | CCAM type I                                | 18                                       | Left lower lobe     |
| 7                 | CCAM type I                                | 1.5                                      | Left superior lobe  |
| 8                 | CCAM type I                                | 11.5                                     | Right lower lobe    |
| 9                 | CCAM type II                               | 16                                       | Left lower lobe     |
| 10                | CCAM type I                                | 18                                       | Right basal pyramid |
| 11                | CCAM type I                                | 22                                       | Left lower lobe     |
| 12                | CCAM type I                                | 18                                       | Right lower lobe    |
| 13                | CCAM type I                                | 21                                       | Left lower lobe     |
| 14                | CCAM type I                                | 20                                       | Left lower lobe     |
| 15                | PPB type I<br>DICER1 status: unknown       | 36                                       | Left lower lobe     |
| 16                | PPB type I<br>DICER1 status: unknown       | 3                                        | Left lung           |
| 17                | PPB type I<br>DICER1: c.3293G>A            | 1.5                                      | Left lingula        |
| 18                | PPB type II<br>DICER1: c.2379T>G           | 24                                       | Right lung          |
| 19                | PPB type II<br>DICER1: c.5392delA          | 36                                       | Left lower lobe     |
| 20                | PPB type III<br>DICER1: c.2040+1G>T        | 36                                       | Right lower lobe    |
| 21                | PPB type III<br>DICER1: c.4407_4410delTTCT | 48                                       | Right lower lobe    |



**Table S2. List of primary and secondary antibodies used for IHC, IF and ChIP**

| Antigen                                       | Antibody/clone                   | Reference      | Source                                                           | Dilution |
|-----------------------------------------------|----------------------------------|----------------|------------------------------------------------------------------|----------|
| <b>IHC and IF analyses</b>                    |                                  |                |                                                                  |          |
| ABCA3                                         | rabbit polyclonal                | WRAB-ABCA3     | Seven Hills Bioreagents, Cincinnati, OH, USA                     | 1:500    |
| Acetylated tubulin                            | mouse monoclonal/clone 6-11B-1   | T6793          | Sigma Aldrich, Oakville, ON, Canada                              | 1:2000   |
| Active-caspase3                               | rabbit polyclonal                | 9661           | Cell Signaling, Danvers, MA, USA                                 | 1:200    |
| Aquaporin5                                    | rabbit polyclonal                | AB78486        | Abcam, Toronto, ON, Canada                                       | 1:500    |
| $\alpha$ SMA                                  | rabbit polyclonal                | AB5694         | Abcam, Toronto, ON, Canada                                       | 1:300    |
| BrdU                                          | mouse monoclonal/clone 131-14871 | MAB4072        | Millipore, Billerica, MA, USA                                    | 1:1000   |
| CC10                                          | goat polyclonal                  |                | Dr. G. Singh, Georgia Regents University Medical Center, GA, USA | 1:500    |
| Cyclin D1                                     | rabbit monoclonal/clone SP4      | RM-9104-S1     | Thermo Fisher Scientific, Waltham, MA, USA                       | 1:200    |
| E-cadherin                                    | mouse monoclonal                 | 36/E-Cadherin  | BD Biosciences Pharmingen, Franklin Lakes, NJ, USA               | 1:200    |
| FOXA2                                         | rabbit polyclonal                | WRAB-FOXA2     | Seven Hills Bioreagents, Cincinnati, OH, USA                     | 1:2000   |
| Ki67                                          | mouse monoclonal/clone MM1       | NCL-L-Ki67-MM1 | Leica Biosystems, Concord, ON, Canada                            | 1:200    |
| NKX2-1                                        | rabbit polyclonal                | WRAB-TTF1      | Seven Hills Bioreagents, Cincinnati, OH, USA                     | 1:3000   |
| p63                                           | mouse monoclonal clone 4A4       | sc-8431        | Santa Cruz, Santa Cruz, CA, USA                                  | 1:100    |
| PECAM-1                                       | rat monoclonal/clone 13.3        | 557355         | BD Biosciences Pharmingen, Franklin Lakes, NJ, USA               | 1:75     |
| pERK                                          | rabbit monoclonal                | 4370           | Cell Signaling, Danvers, MA, USA                                 | 1:200    |
| pHH3                                          | rabbit monoclonal                | 9701           | Cell Signaling, Danvers, MA, USA                                 | 1:200    |
| proSP-C                                       | rabbit polyclonal                | AB3786         | Millipore, Billerica, MA, USA                                    | 1:1500   |
| SOX2                                          | rabbit monoclonal                | 3728           | Cell Signaling, Danvers, MA, USA                                 | 1:150    |
| SOX9                                          | rabbit polyclonal                | sc-20095       | Santa Cruz, Santa Cruz, CA, USA                                  | 1:100    |
| T1 $\alpha$                                   | syrian-hamster/clone 8.1.1.      |                | Hybridoma Bank, IO, USA                                          | 1:1000   |
| Vimentin                                      | rabbit monoclonal/clone D21H3    | 5741           | Cell Signaling, Danvers, MA, USA                                 | 1:200    |
| YY1                                           | rabbit polyclonal                | sc-1703        | Santa Cruz, Santa Cruz, CA, USA                                  | 1:300    |
| Biotinylated goat anti-rabbit                 |                                  | BA-1000        | Vector Laboratories, Burlington, ON, Canada                      | 1:300    |
| Biotinylated swine anti-goat                  |                                  | CLCC50015      | Cedarlane, Burlington, ON, Canada                                | 1:300    |
| Biotinylated goat anti-syrian hamster         |                                  | 107-065-142    | Cedarlane, Burlington, ON, Canada                                | 1:300    |
| Biotinylated goat anti-rat                    |                                  | 112-065-062    | Cedarlane, Burlington, ON, Canada                                | 1:500    |
| Biotinylated goat anti-mouse                  |                                  | 115-065-003    | Cedarlane, Burlington, ON, Canada                                | 1:500    |
| Donkey anti-rabbit, Alexa Fluor 594 conjugate |                                  |                | Molecular Probes, Eugene, OR, USA                                | 1:250    |
| <b>ChIP assay</b>                             |                                  |                |                                                                  |          |
| YY1                                           | rabbit polyclonal                | sc-1703        | Santa Cruz, Santa Cruz, CA, USA                                  |          |
| Histone H3                                    | rabbit polyclonal                | ab1791         | Abcam, Toronto, ON, Canada                                       |          |
| IgG                                           | -                                | sc-2027        | Santa Cruz, Santa Cruz, CA, USA                                  |          |

**Table S3. List of primer sequences**

| <b>(A) qRT-PCR</b> |                                                              |                           |
|--------------------|--------------------------------------------------------------|---------------------------|
| <b>Gene</b>        | <b>Sequence (5'-3')</b>                                      | <b>Fragment size (bp)</b> |
| <i>Bmp4</i>        | F- AGCGTCCC GCCAGCCGA<br>R- CGGAGCTCTGCCGAGGAG               | 148                       |
| <i>Cdkn1a</i>      | F- TCTCAGGGCCGAAAACGG<br>R- ACTTCAGGGTTTTCTCTTGCA            | 90                        |
| <i>Dicer</i>       | F- CGCCTCCTACCACTACAACA<br>R- AGAGCGCAAGTCAGTCAAGA           | 145                       |
| <i>Elf5</i>        | F- ACATTGCTCGCAAGGTTAC<br>R- GTTCGGCTGTGACAGTCTTG            | 127                       |
| <i>Etv4</i>        | F- GTCACTTCCAAGAGACGTGG<br>R- GGGGCTATGGAAAGAGTTTTCTG        | 98                        |
| <i>Etv5</i>        | F- TGAGAGGCGGGTATTTCTCC<br>R- CCCTCTCGATACATGGTGGG           | 139                       |
| <i>Fgf9</i>        | F- TATCCAGGGAACCAGGAAAGAC<br>R- CAGGCCCACTGCTATACTGATAAA     | 70                        |
| <i>Fgf10</i>       | F- TCAAAGCCATCAACAGCAACTATT<br>R- CTCTTTCAGCTTACAGTCGTTGTAAA | 95                        |
| <i>Foxf1</i>       | F- AGCAGCCATACCTTCACCAA<br>R- CTGGGCGACTGTGAGTGATA           | 82                        |
| <i>Foxp1</i>       | F- AAAAGACAAAGAGCGCCTGC<br>R- CAGACTTGGAGAGGGTGACA           | 116                       |
| <i>Foxp2</i>       | F- ATGCATTGGATGACCGAAGC<br>R- AGTGGGTCATCATCGCTTGA           | 114                       |
| <i>Foxp4</i>       | F- GCAGCTGACGCTAAATGAGA<br>R- TCCACACGGACGAAACACTT           | 129                       |
| <i>Hdac1</i>       | F- CGAATCCGCATGACTCACAA<br>R- GTCATCTCCTCAGCATTGGC           | 95                        |
| <i>Hdac2</i>       | F- ATGGCGTACAGTCAAGGAGG<br>R- GGGATGACCCTGGCCATAAT           | 90                        |
| <i>Hip1</i>        | F- CACTTCAACAGCACCAACCA<br>R- AGTAGGATGTCGATCCACGG           | 87                        |
| <i>Hoxa5</i>       | F- CCCAGATCTACCCCTGGATG<br>R- GGCATGAGCTATTTTCGATCCT         | 173                       |
| <i>Hoxb5</i>       | F- TATTCCCCTGGATGAGGAAG<br>R- GGGTCAGGTAGCGATTGAAG           | 135                       |
| <i>Irx2</i>        | F- CCGTCCTACGTGGGCTC<br>R- GGTCGTTGAGCTGGTATGGA              | 106                       |
| <i>Irx3</i>        | F- GGTACGGCGCCTTCCT<br>R- AGGGCTGTCCTTCAGCTC                 | 84                        |
| <i>Irx5</i>        | F- AACTCGCACCTCCAGTACG<br>R- TATCCCAAGGAACCTGCCAT            | 110                       |
| <i>Ptc1</i>        | F- GCCTCATTGGGATCAAGCTG<br>R- GCATAGCCCTGTGGTTCTTG           | 135                       |
| <i>Rpl19</i>       | F- GATCATCCGCAAGCCTGTGA<br>R- GCATCCGAGCATTGGCAGTA           | 122                       |
| <i>Shh</i>         | F- TGA CT CAGAGGTGCAAAGACA<br>R- ACTCCTCTGAATGATGGCCG        | 120                       |

|              |                                                     |     |
|--------------|-----------------------------------------------------|-----|
| <i>Spry2</i> | F- AAGCCGCGATCACGGAGTTCA<br>R- CTGCAGCAAAGGCTGCGACC | 113 |
| <i>Yy1</i>   | F- CATGTGGTCCTCGGATGAAA<br>R- GGGAGTTTCTTGCCTGTCATA | 117 |

| <b>(B) ChIP</b> |                                                          |                           |
|-----------------|----------------------------------------------------------|---------------------------|
| <b>Gene</b>     | <b>Sequence (5'-3')</b>                                  | <b>Fragment size (bp)</b> |
| <i>Sfrs10</i>   | F-TTTCTCCGCTTCACCCTTGGA<br>R-AACGGTATCTTCTTTTCGCCGTTGGA  | 175                       |
| <i>Rcor3</i>    | F-GTCTCAGCTGAAGGAATTTGGCCT<br>R-GCCATCCTCATAGCTCCTGTCAAA | 157                       |
| <i>Shh #1</i>   | F-CTGGAGAGCTTGTGAGACAG<br>R-AGTCTTTCTCAGGGTTAACATCA      | 113                       |
| <i>Shh #2</i>   | F-CGAAGACCAAATAAGAGCCAGA<br>R-CTGGATCAAGAACAGTGGGT       | 104                       |
| <i>Shh #3</i>   | F-CCTAAGCTGCCAGTGTTCTATG<br>R-GAACCAAGTCACCTCCTTCTTC     | 97                        |
| <i>Shh #4</i>   | F-CCCTGGAGGCATAGTCCTG<br>R-CCGAAGGCAGAGTGAGGA            | 79                        |
| <i>Shh #5</i>   | F-CTGTCCAGAGTGAGCACAAG<br>R-CTCCATTTCCAGTGTGAGG          | 103                       |
| ctl<br>locus    | F-AGACCTGGATATAGTTAAGATGCG<br>R-ACCCTGTGTTCCATCCAATAG    | 83                        |
